# Supplementary material for: Artemisinin resistance-associated markers in Plasmodium falciparum parasites from the China-Myanmar border: predicted structural stability of K13 propeller variants detected in a low-prevalence area
Source: PubMed Central journal article supplement (PMC6422288; doi:10.1371/journal.pone.0213686), 2019-03-18
Supplement: pone.0213686.s001.pdf [file pone.0213686.s001.pdf]

## S1 Table

### Study samples

| Source     | 2012 | 2013 | 2014 | 2015 | Total |
|------------|------|------|------|------|-------|
| Indigenous | 2    | 2    | 4    | -    | 8     |
| Myanmar    | 14   | 4    | 21   | 14   | 53    |
| Africa     | -    | -    | 8    | 3    | 11*   |
| Total      | 16   | 6    | 33   | 17   | 72    |

\* includes travellers to Cameroon (n=2), Chad (n=1), Ethiopia (n=1), Mali (n=3), and Nigeria (n=4)
