# Supplementary material for: Artemisinin resistance-associated markers in Plasmodium falciparum parasites from the China-Myanmar border: predicted structural stability of K13 propeller variants detected in a low-prevalence area
Source: PubMed Central journal article supplement (PMC6422288; doi:10.1371/journal.pone.0213686), 2019-03-18
Supplement: pone.0213686.s002.pdf [file pone.0213686.s002.pdf]

**S2 Table**

**Comparison between observed and predicted median half-life (MHL) of parasitaemia using linear and quadratic ( $\Delta\Delta G$ ) analysis of *Pfk13* mutations with the  $-\Delta\Delta G$  values, based on analysis of crystal structures 4YY8b and S-S linked 4ZGCa using the DUET website.**

Although the linear analysis gave a P value  $<0.0001$ , the quadratic analysis was more predictive (F-statistic  $P < 10^{-9}$ ), with predictions closer to the observed half-lives, and values for unlinked 4YY8 having marginal improvements over those from S-S linked 4ZGC.

| Model | Mutant | Obs. MHL | DUET $\Delta\Delta G$ | Linear MHL* | Quad. MHL* | SDM2 $\Delta\Delta G$ | Linear MHL* | Quad. MHL* | Structure   | Patients |
|-------|--------|----------|-----------------------|-------------|------------|-----------------------|-------------|------------|-------------|----------|
| 4YY8b | WT     | 3.17     | 0.00                  | 5.10        | 3.36       | 0.00                  | 5.04        | 3.23/3.18  |             | 43 China |
|       | F446I  | 5.89     | -1.51                 | 6.45        | 6.87       | 0.23                  | 6.15        | 5.95       | B-STRAND 1b | 49 China |
|       | V454I  |          | 0.001                 | 5.11        | 3.36       | -0.03                 | 5.07        | 3.34       | LOOP 1b-1c  |          |
|       | V493H  | 7.40     | -2.28                 | 7.14        | 7.58       | -0.97                 | 6.02        | 6.11       | B-STRAND 2b | 24       |
|       | R539T  | 5.80     | -1.08                 | 6.06        | 6.14       | 0.21                  | 5.92        | 5.68       | B-STRAND 3b | 45       |
|       | Y541H  |          | -2.18                 | 7.04        | 7.53       | -1.42                 | 6.48        | 6.99       | B-STRAND 3b |          |
|       | I543T  | 7.56     | -3.43                 | 8.14        | 7.29       | -3.29                 | 8.38        | 7.54       | B-STRAND 3b | 30       |
|       | P574L  | 5.17     | -0.52                 | 5.56        | 4.87       | -0.58                 | 5.63        | 5.11       | LOOP 3d-4a  | 7 China  |
|       | A578S  |          | -1.45                 | 6.39        | 6.77       | -1.66                 | 6.72        | 7.34       | LOOP 3d-4a  |          |
|       | C580Y  | 6.50     | -1.06                 | 6.04        | 6.10       | -1.15                 | 6.20        | 6.49       | B-STRAND 4a | 264      |
|       | V603E  |          | -2.81                 | 7.59        | 7.64       | -1.62                 | 6.68        | 7.29       | B-STRAND 4c |          |
|       | A676D  |          | -0.85                 | 5.86        | 5.67       | -0.22                 | 5.26        | 3.99       | B-STRAND 6a |          |
| 4ZGCa | WT     | 3.17     | 0.000                 | 5.52        | 3.69       | 0.000                 | 5.77        | 3.93/3.18  |             | 43 China |
|       | F446I  | 5.89     | -1.30                 | 6.39        | 7.15       | 0.23                  | 6.10        | 5.95       | B-STRAND 1b | 49 China |
|       | V454I  |          | -0.08                 | 5.58        | 3.98       | -0.03                 | 5.79        | 4.08       | LOOP 1b-1c  |          |
|       | Y493H  | 7.40     | -2.35                 | 7.10        | 7.99       | -1.46                 | 6.71        | 8.74       | B-STRAND 2b | 24       |
|       | R539T  | 5.80     | -0.71                 | 6.00        | 5.91       | 0.22                  | 5.98        | 5.68       | B-STRAND 3b | 45       |
|       | Y541H  |          | -2.25                 | 7.04        | 7.98       | -1.46                 | 6.71        | 8.74       | B-STRAND 3b |          |
|       | I543T  | 7.56     | -3.54                 | 7.90        | 6.84       | -3.29                 | 7.88        | 7.30       | B-STRAND 3b | 30       |
|       | P574L  | 5.17     | -0.45                 | 5.83        | 5.19       | -0.58                 | 6.14        | 6.47       | LOOP 3d-4a  | 7 China  |
|       | A578S  |          | -1.47                 | 6.51        | 7.40       | -1.75                 | 6.89        | 9.07       | LOOP 3d-4a  |          |
|       | C580Y  | 6.50     | -0.74                 | 6.02        | 5.99       | -0.47                 | 6.07        | 6.05       | B-STRAND 4a | 264      |
|       | V603E  |          | -2.66                 | 7.31        | 7.90       | -1.62                 | 6.81        | 8.95       | B-STRAND 4c |          |
|       | A676D  |          | -0.95                 | 6.16        | 6.48       | -0.82                 | 6.30        | 7.28       | B-STRAND 6a |          |

\* Predicted
