# Supplementary material for: Artemisinin resistance-associated markers in Plasmodium falciparum parasites from the China-Myanmar border: predicted structural stability of K13 propeller variants detected in a low-prevalence area
Source: PubMed Central journal article supplement (PMC6422288; doi:10.1371/journal.pone.0213686), 2019-03-18
Supplement: pone.0213686.s003.pdf [file pone.0213686.s003.pdf]

## S1 Figure

CLUSTAL Omega (version 1.2.4) multiple sequence alignment of the low-affinity and high affinity sites of human NRF2 (bold) which bind to the Keap 1 propeller protein and proposed similar sites in the *P. falciparum* WD40 repeat protein.

```
NRF2      QQDMDLIDILWRQDIDLGVSR-EVFDfsQR-----RKEYELEKQKKL-- 54
PfW7K5T2  DKGLNSFIILWKINETSFLDPIKKFYYNCEENEKkrTHIYNNKKKNQDEYDINQINDNTI 177
          ::::: : ***: :      :. : * :. .      :. ** :::: :.

NRF2      EK--ERQE-----QLQKEQ-----EKA-FFAQLQLDEETGE 82
PfW7K5T2  DNSENGDAINNNVGYECIDISHDNRYICALTEEKIYIKSNTKYDDETGE 227
          :: * . :      : : :      ** : : : * :*****
```

In NRF2 there are seven lysine (**K**) residues between the 2 sites, six of which are destined to be ubiquitinated in the propeller. In the *P. falciparum* WD40 repeat protein there are six Lys residues between the putative low and high affinity sites. A closely similar picture for putative low and high affinity sites in WD40 was confirmed in *P. reichenowi* and *P. gaboni*, although sufficient sequence was not available in the PlasmoDB database to confirm the similarity of the proposed high affinity binding site in other species.
