# Supplementary material for: Artemisinin resistance-associated markers in Plasmodium falciparum parasites from the China-Myanmar border: predicted structural stability of K13 propeller variants detected in a low-prevalence area
Source: PubMed Central journal article supplement (PMC6422288; doi:10.1371/journal.pone.0213686), 2019-03-18
Supplement: pone.0213686.s004.pdf [file pone.0213686.s004.pdf]

## S2 Figure

Quadratic relationship between parasitaemia half-life and inferred Delta-delta Gibbs energy (DDG,  $\Delta\Delta G$ ). Predictions (solid squares) for V603E, Y541H, A578S, A676D, P574L, and V454I are presented (blue); WT = wild type; horizontal dashed lines are the medians per mutation

### (a) 4YY8b (DUET)

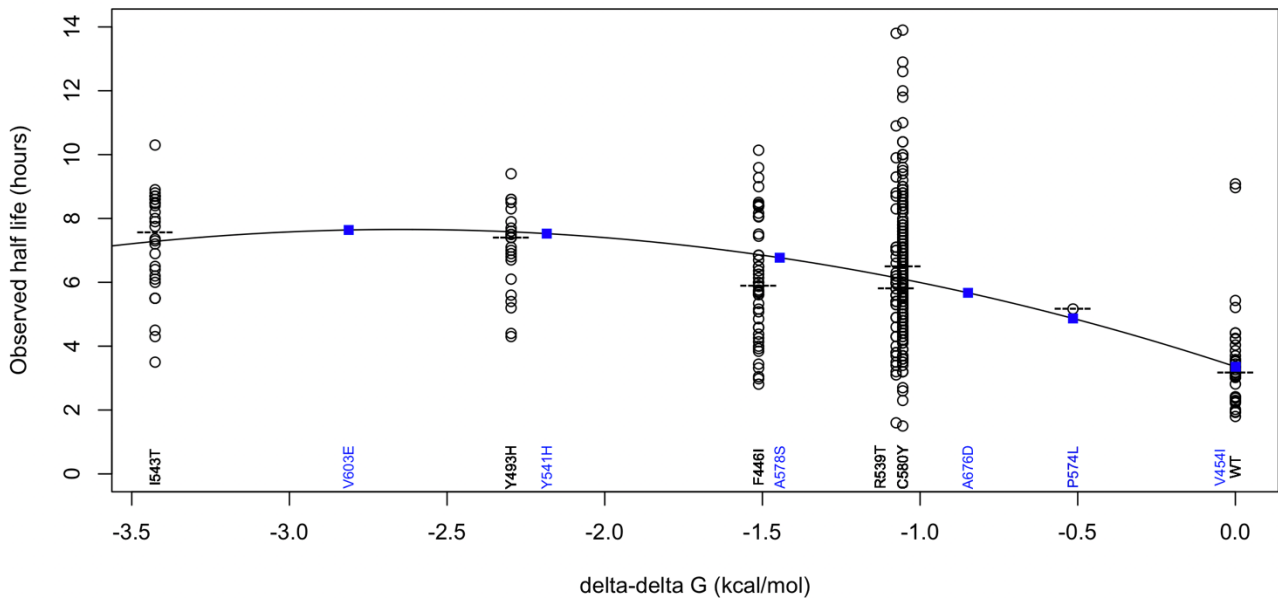

Black line:  $3.359 - 3.248 \text{ DDG} - 0.614 \text{ DDG}^2$ ; adjusted  $R^2 = 0.174$ ; inclusion of quadratic effect ( $P < 6 \times 10^{-10}$ )

### (b) 4ZGCa (DUET)

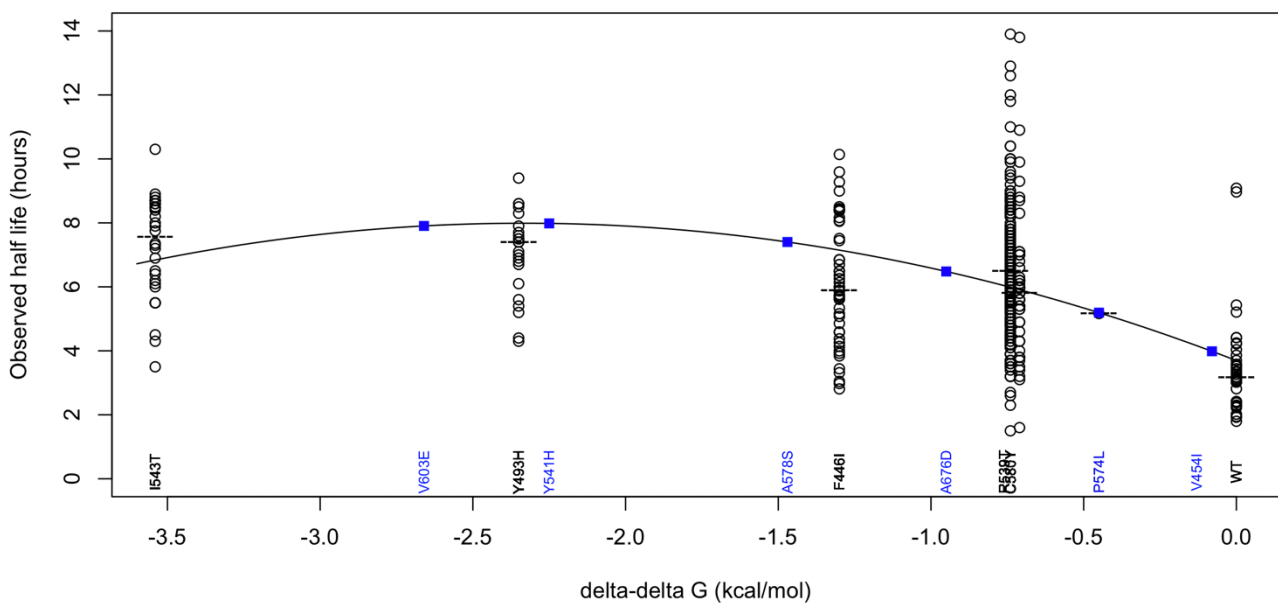

Black line:  $3.696 - 3.681 \text{ DDG} - 0.789 \text{ DDG}^2$ ; adjusted  $R^2 = 0.140$ ; inclusion of quadratic effect ( $P < 3 \times 10^{-9}$ )

**(c) 4YY8b (SDM2)**

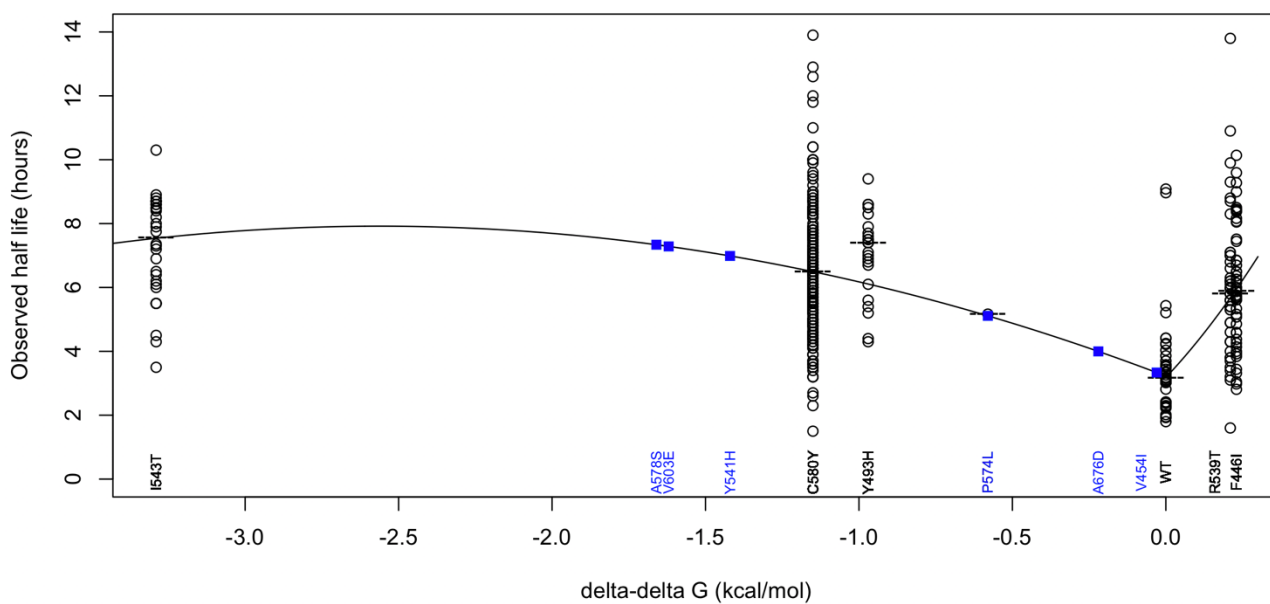

Black lines: (negative DDG)  $3.227 - 3.663 \text{ DDG} - 0.715 \text{ DDG}^2$ ; (positive DDG)  $3.182 + 10.18 \text{ DDG} + 8.087 \text{ DDG}^2$ ;  
adjusted  $R^2 = 0.246$ ; inclusion of quadratic effect ( $P < 7 \times 10^{-13}$ )

**(d) 4ZGCa (SDM2)**

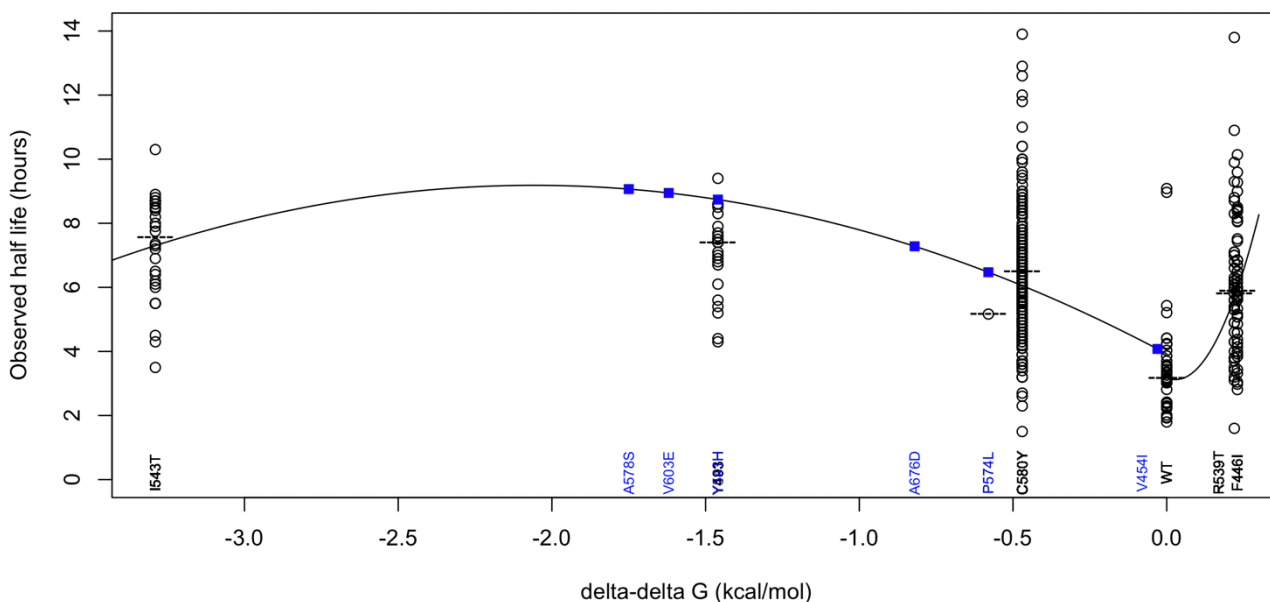

Black lines: (negative DDG)  $3.926 - 5.109 \text{ DDG} - 1.241 \text{ DDG}^2$ ; (positive DDG)  $3.182 - 4.096 \text{ DDG} + 70.15 \text{ DDG}^2$ ;  
adjusted  $R^2 = 0.185$ ; inclusion of quadratic effect ( $P < 2 \times 10^{-12}$ )
